# Supplementary material for: Efficient broadband light sensing with anisotropic Sb 2 S 3 based thin film heterojunction photodetectors under self-driven conditions
Source: Royal Society of Chemistry journal article supplement (doi:10.1039/d5tc03597j), 2026-01-01
Supplement: d5tc03597j1.pdf [file d5tc03597j1.pdf]

## Efficient broadband light sensing with anisotropic Sb<sub>2</sub>S<sub>3</sub> based thin film heterojunction photodetectors under self-driven condition

Srinivasan Moosi Govindharajulu<sup>1</sup>, Jaivardhan Sinha<sup>2</sup> and Malar Piraviperumal<sup>1\*</sup>

<sup>1</sup>*Thinfilm Photovoltaics Laboratory, Department of Physics and Nanotechnology, SRM Institute of Science and Technology, Kattankulathur, Chengalpattu, Tamil Nadu-603 203, India.*

<sup>2</sup>*Spintronics and Nanomagnetism Laboratory, Department of Physics and Nanotechnology, SRM Institute of Science and Technology, Kattankulathur, Chengalpattu, Tamil Nadu-603 203, India.*

### Supplementary File

*Table S1. As-deposited and post sulfurized Sb<sub>2</sub>S<sub>3</sub> thin films crystallite size, dislocation density and microstrain values calculated from Williamson–Hall plots.*

| Sample   | Crystallite size (nm) | Dislocation density ( $\delta$ ) $\times 10^{14}$ (m <sup>-2</sup> ) | Micro strain ( $\epsilon$ ) $\times 10^{-4}$ |
|----------|-----------------------|----------------------------------------------------------------------|----------------------------------------------|
| S-250 °C | 29.5                  | 11.4                                                                 | 6.7                                          |
| S-275 °C | 35.5                  | 7.9                                                                  | 5.6                                          |
| S-300 °C | 43.3                  | 5.3                                                                  | 4.6                                          |
| S-325 °C | 53.2                  | 3.5                                                                  | 5.8                                          |

---

\* malar.piraviperumal@gmail.com

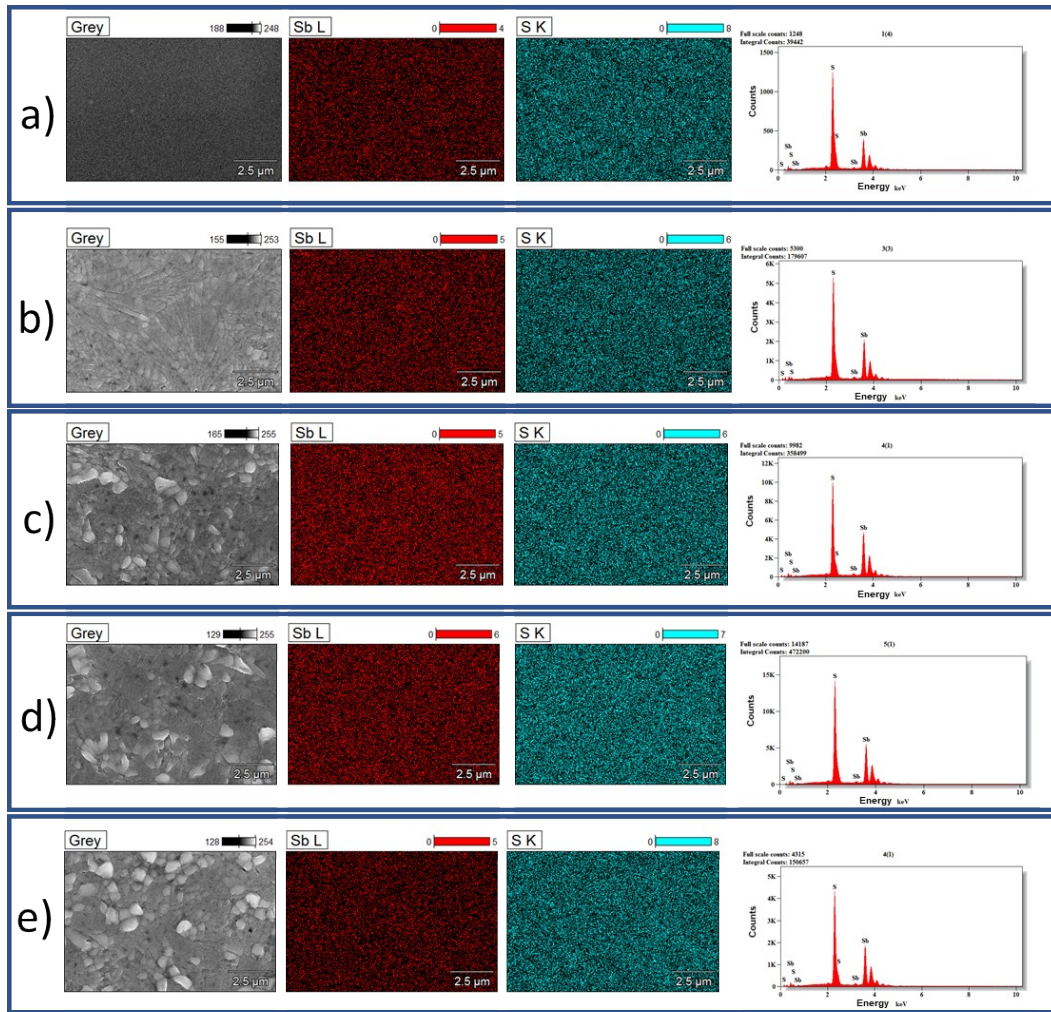

Figure S1. Elemental mapping profiles and EDX spectra of the  $\text{Sb}_2\text{S}_3$  thin films (a) as-deposited, (b) S-250 °C, (c) S-275 °C, (d) S-300 °C and (e) S-325 °C.

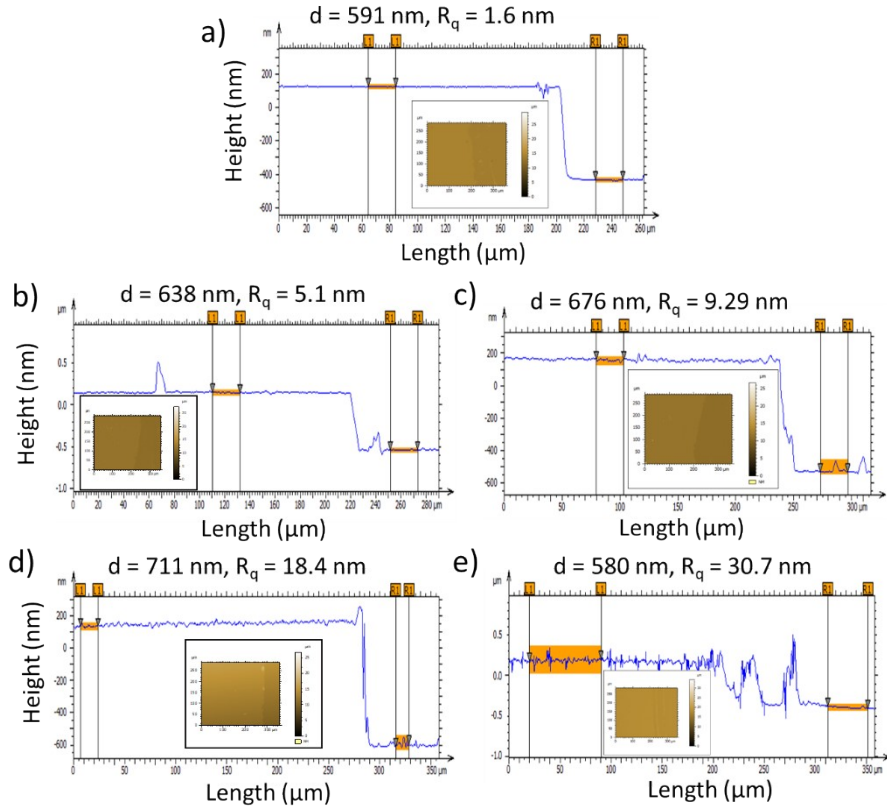

Figure S2. Optical profilometer 1D and 2D data of the  $\text{Sb}_2\text{S}_3$  thin films (a) as-deposited, (b) S-250 °C, (c) S-275 °C, (d) S-300 °C and (e) S-325 °C

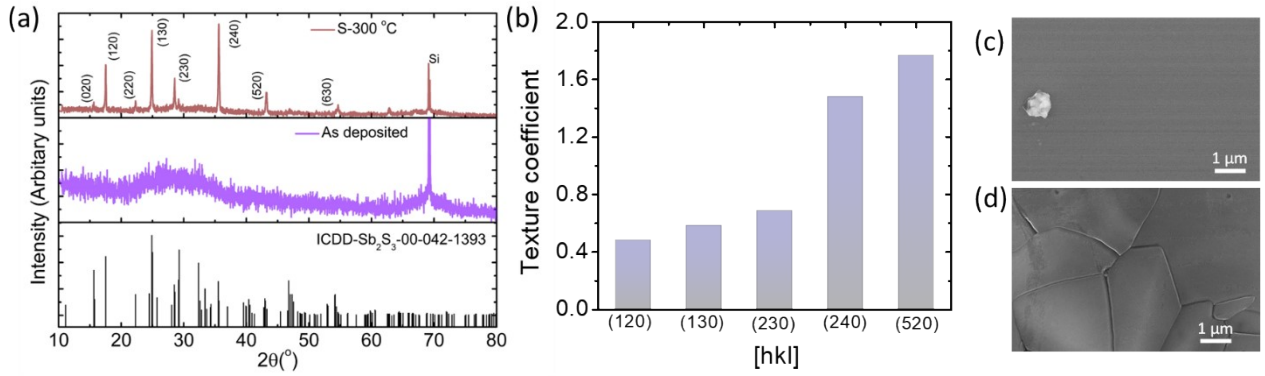

Figure S3. (a) XRD patterns of as-deposited and post sulfurized  $\text{Sb}_2\text{S}_3$  thin films prepared on Si, (b) texture coefficient for post sulfurized  $\text{Sb}_2\text{S}_3$  thin film, SEM images of (c) as-deposited and (d) post sulfurized  $\text{Sb}_2\text{S}_3$  thin films prepared on Si

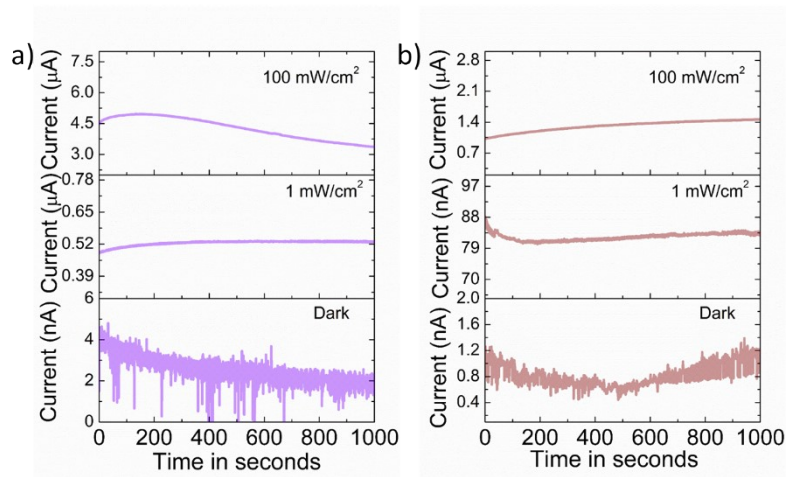

Figure S4. Current for longer exposure time under dark and 1 mW/cm<sup>2</sup> and 100 mW/cm<sup>2</sup> white light intensities for (a) as-deposited and (b) S-300 °C photodetectors

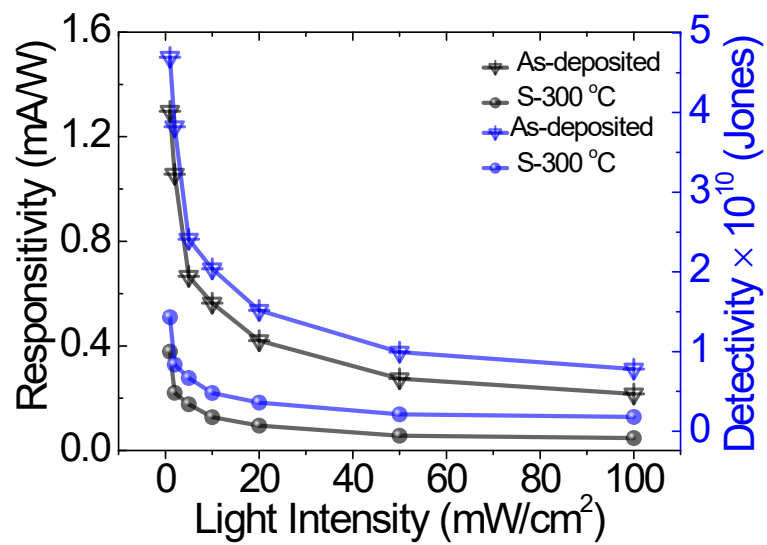

Figure S5. Responsivity and detectivity values measured under white light illumination with varied light intensity (1-100 mW/cm<sup>2</sup>) for the as-deposited and S-300 °C heterojunction photodetectors
